# Supplementary material
Source: Springer Nature journal article supplement (https://www.springermedizin.de/resource/supplementary/12968_2008_484_MOESM1_ESM.pdf/9579088)

- Lumen Diameter (LD)
- Vessel Diameter (VD)
- Lumen Area (LA)
- Total Vessel Area (TVA)
- Wall Area (WA = TVA-LA)
- Wall Thickness (WT)
- Standard Deviation of Wall Thickness
- NWI =  
Wall Area / Total Vessel Area (WA/TVA)

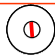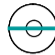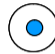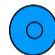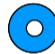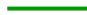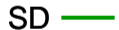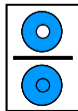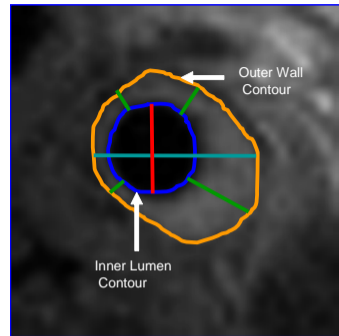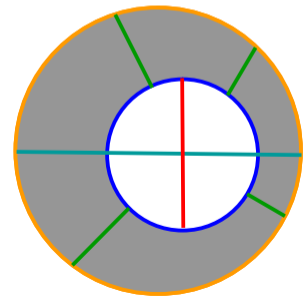

Supplement: MOESM1 [file 9579088]
